# Supplementary material
Source: HighWire-hosted journal article supplement (http://www.qdcxjkg.com/highwire/filestream/113768/field_highwire_adjunct_files/0/ERJ-01607-2012_Disclosures.pdf)
Supplement: ERJ-01607-2012_Disclosures.pdf [file ERJ-01607-2012_Disclosures.pdf]

**A. Vonk-Noordegraaf** has received lecture fees from Actelion, Bayer, GlaxoSmithKline, Lilly and Pfizer. He has also been part of industry advisory boards for Actelion and Bayer and has served on steering committees for Actelion, Bayer and Pfizer.
